# Supplementary material
Source: PubMed Central journal article supplement (PMC11159384)
Supplement: CAS-101-1822-s001.pdf [file CAS-101-1822-s001.pdf]

Supporting information Fig. S2.

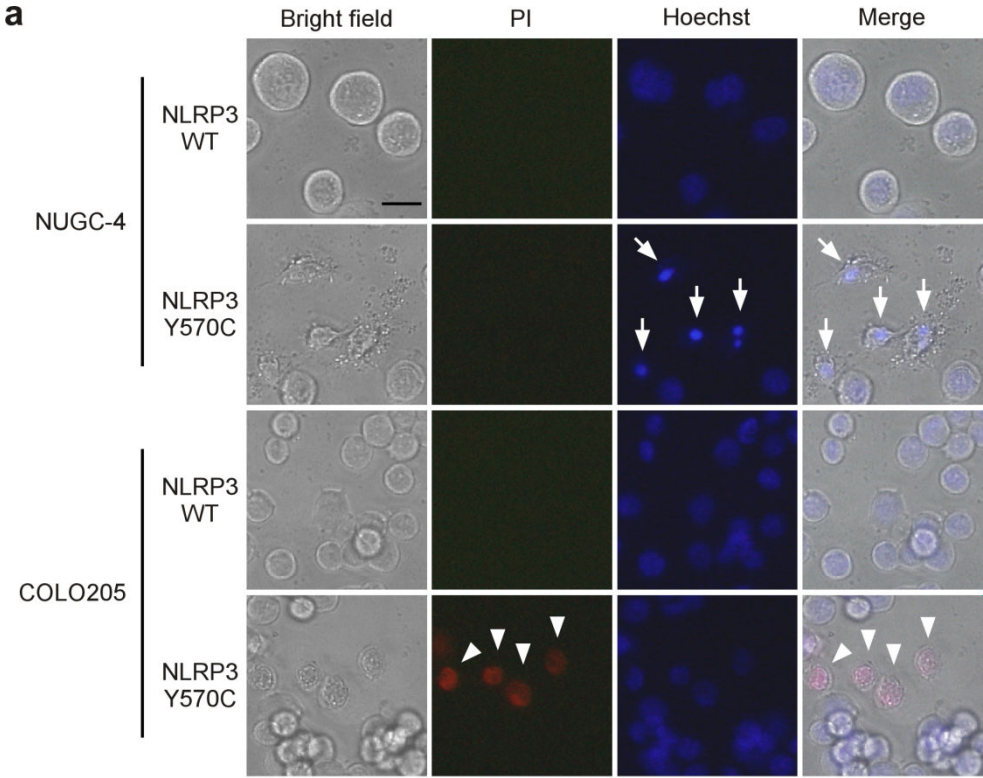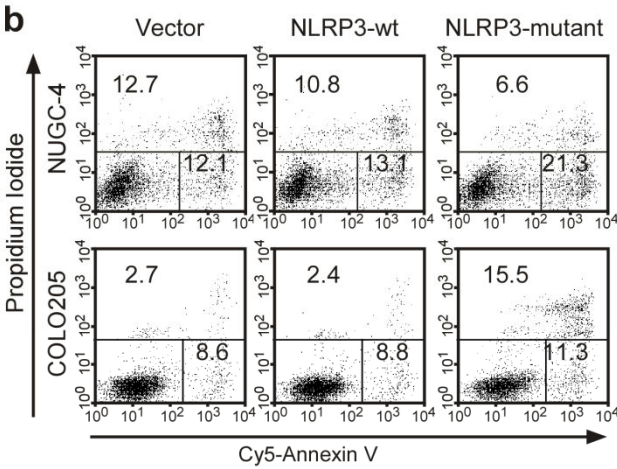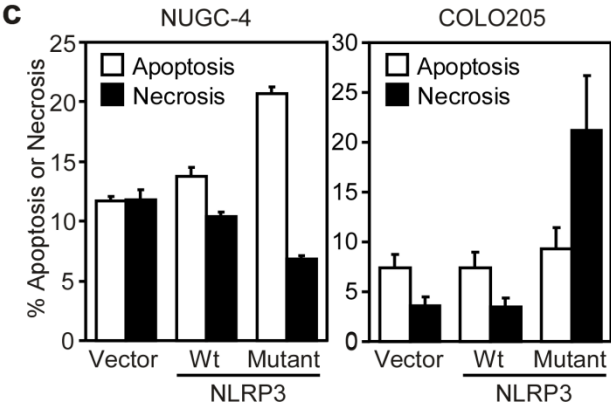

**Fig. S2.** The Y570C mutant of NLRP3 induced apoptosis and necrosis in NUGC-4 and COLO205 cells, respectively. (a) Fluorescent microscopic images in Figure 1e were shown. Arrows and arrowheads indicate apoptotic cells and necrotic cells, respectively. Scale bar, 20  $\mu$ m. (b, c) NUGC-4 and COLO205 cells were transfected with empty vector or an expression plasmid for wild-type or the Y570C mutant NLRP3 using the Neon<sup>TM</sup> Transfection System (Invitrogen) according to the manufacturer's protocol. After a 12-h (NUGC-4) or 6-h culture (COLO205), the cells were analyzed as described in Figure 1b. (b) Two-dimensional profiles for the Cy5-annexin V- and propidium iodide- staining of cells. The percentages of early apoptotic cells and necrotic cells are indicated. (c) The percentages of apoptotic NUC12N2 cells and necrotic CLC12N2 cells were plotted. Experiments were done in duplicate, and error bars represent the range of the duplicate data.
