# Supplementary material
Source: PubMed Central journal article supplement (PMC11159384)
Supplement: CAS-101-1822-s002.pdf [file CAS-101-1822-s002.pdf]

Supporting information Fig. S3.

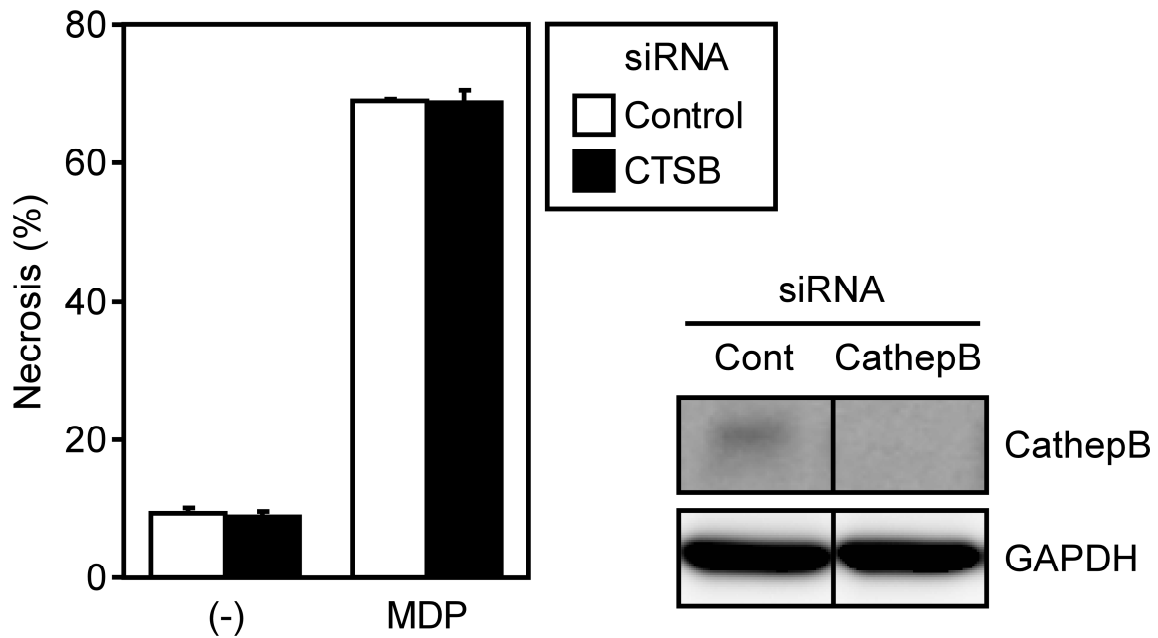

**Fig. S3.** Reduction of cathepsin B expression by siRNA did not inhibit MDP-induced necrosis of CLC12N2 cells. CLC12N2 cells were transfected with control or cathepsin B (CTSB)-targeting siRNA (ON-TARGETplus SMARTpool, L-004266-00, Dharmacon, Chicago, IL). The cells were cultured with MDP (100 ng/ml) or left untreated for the last 8 h of a 48-h culture, stained with Cy5-annexin V and propidium iodide, and analyzed by flow cytometry. The percentages of necrotic cells were plotted (left panel). Experiments were done in duplicate, and error bars represent the range of the duplicate data. The expression levels of cathepsin B and GAPDH at the end of the 48-h culture without MDP stimulation were examined by Western blotting (right panels).
