# Supplementary material
Source: PubMed Central journal article supplement (PMC11159384)
Supplement: CAS-101-1822-s003.pdf [file CAS-101-1822-s003.pdf]

Supporting information Fig. S4

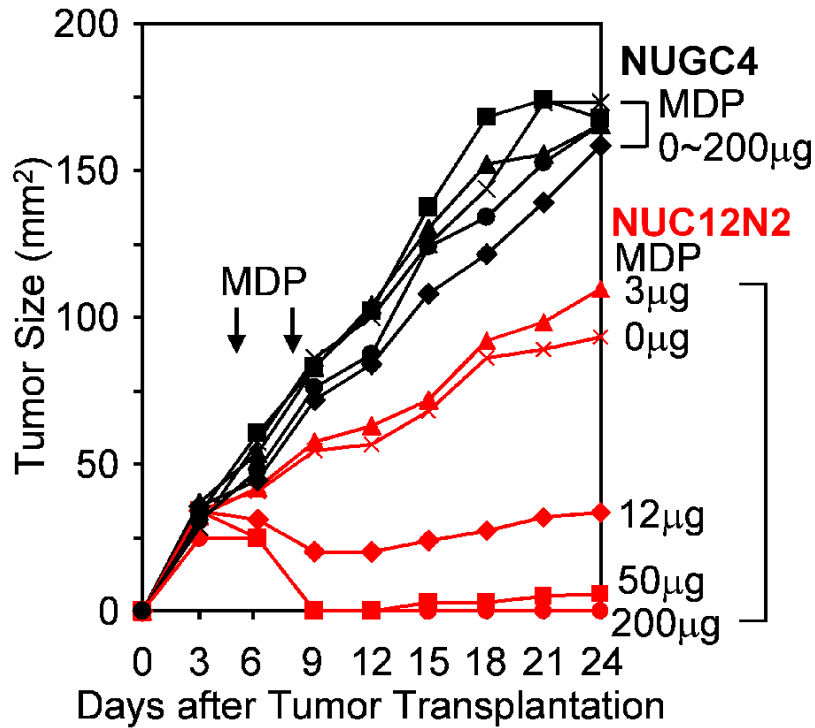

**Fig. S4.** Dose-dependent suppression of the growth of NUC12N2 tumors by MDP-treatment. NUGC-4 and NUC12N2 cells ( $2.5 \times 10^6$ ) were transplanted intradermally into the back of nude mice ( $n=4$ ) on day 0. The mice received intravenous injections of 0 (crosses), 3 (triangles), 12 (diamonds), 50 (squares), or 200  $\mu\text{g}$  (circles) of MDP on days 5 and 8 (vertical arrows). The black and red lines indicate the growth curves of NUGC-4 and NUC12N2 tumors, respectively.
