# Supplementary material
Source: PubMed Central journal article supplement (PMC11159384)
Supplement: CAS-101-1822-s004.pdf [file CAS-101-1822-s004.pdf]

Supporting information Fig. S1.

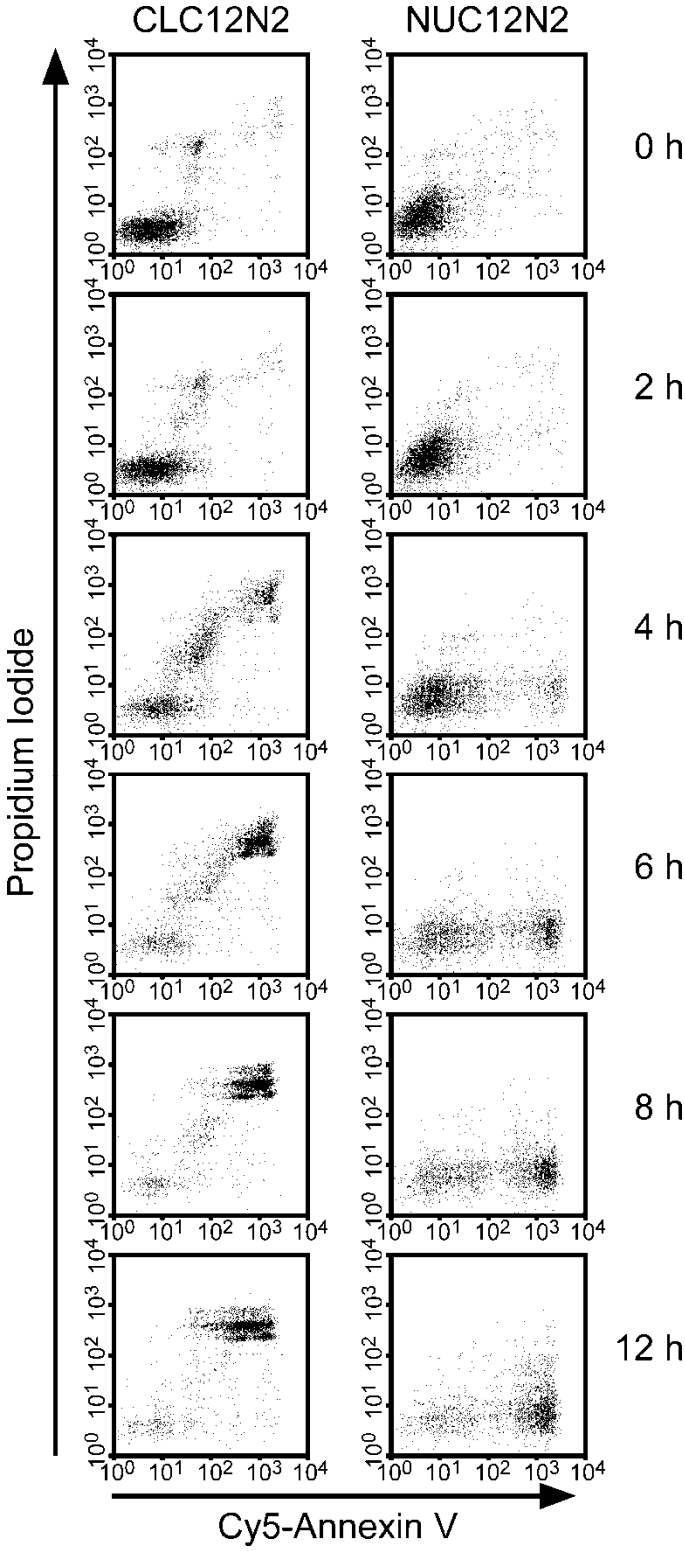

**Fig. S1.** Representative flow cytometry profiles of cells shown in Fig. 1c.
